# Supplementary material for: Innate acting memory Th1 cells modulate heterologous diseases
Source: PubMed Central journal article supplement (PMC11181110; doi:10.1073/pnas.2312837121), 2024-06-05
Supplement: pnas.2312837121.sapp.pdf [file pnas.2312837121.sapp.pdf]

## **Supporting Information for** Innate acting memory Th1 cells modulate heterologous diseases

Nikolas Rakebrandt\*, Nima Yassini\*, Anna Kolz, Michelle Schorer, Katharina Lambert, Eva Goljat, Anna Estrada Brull, Celine Rauld, Zsolt Balazs, Michael Krauthammer, José M. Carballido, Anneli Peters, Nicole Joller

Nicole Joller  
Email: [nicole.joller@uzh.ch](mailto:nicole.joller@uzh.ch)

### **This PDF file includes:**

Figures S1 to S6  
Table S1

### **Other supporting materials for this manuscript include the following:**

Datasets S1 (E-MTAB-11521 on the ArrayExpress database at EMBL-EBI)

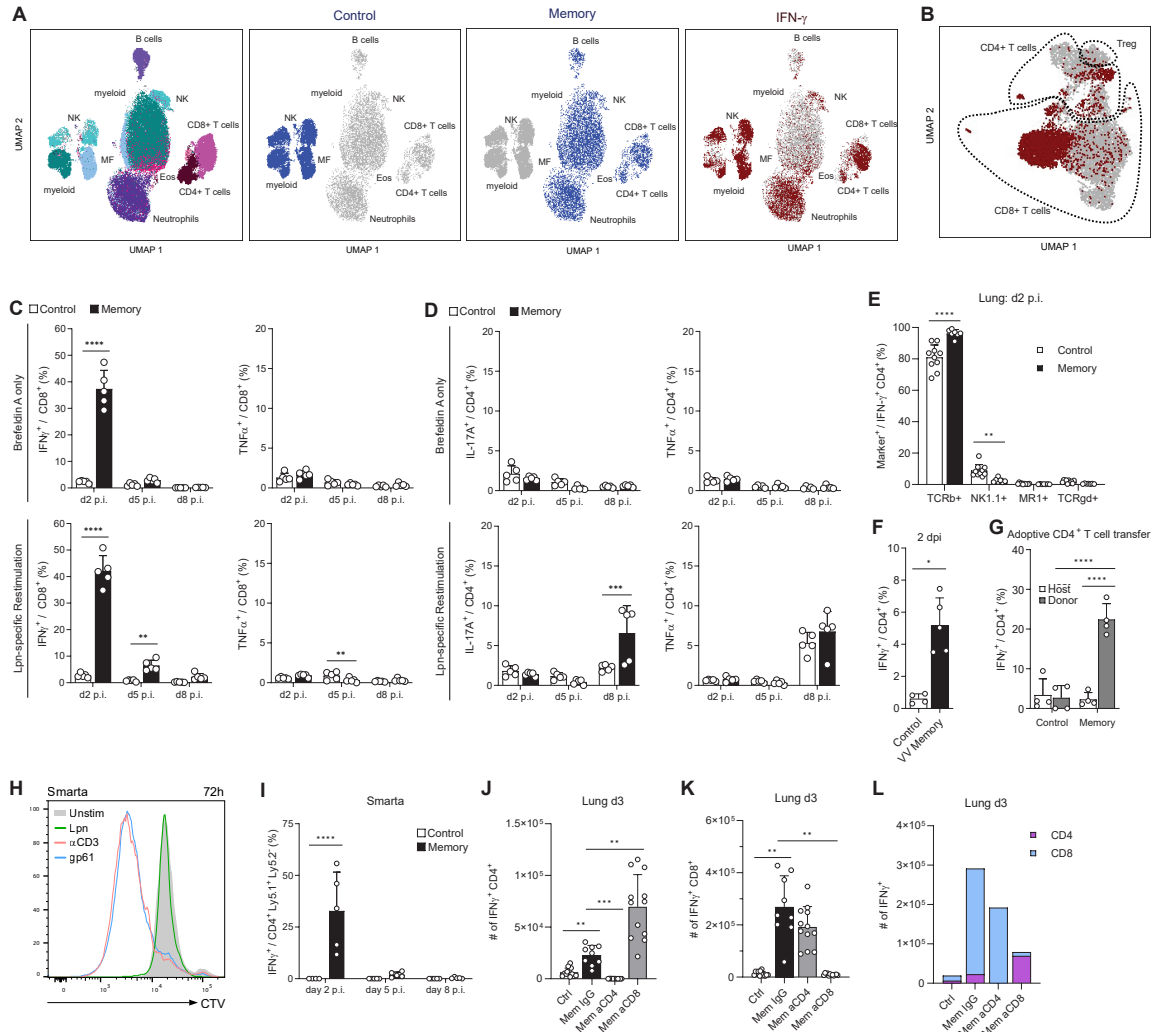

**Fig. S1. Early antigen-independent response in virus-experienced T cells upon heterologous infection.** Control and LCMV memory mice were challenged with Lpn (A-E, I-L). Cells from the lung were either treated with Brefeldin A only (A-G, H-K) or were restimulated with Lpn-extract followed by Brefeldin A incubation (C-D). A, UMAP of the combined dataset acquired by CyTOF (days 0 and 3;  $n = 3$ ). Color code indicates manual annotation according to lineage marker expression profiles (left) or the indicated subset. B, same as (A), gated on T cells, IFN- $\gamma$ + cells are highlighted. C-D, Cytokine response from CD8+ (C) and CD4+ (D) T cells was measured by flow cytometry ( $n = 5$ ). E, CD4+IFN- $\gamma$ + cells were examined for their expression of indicated markers ( $n = 7-10$ ). F, IFN- $\gamma$  production of control or vaccinia virus (VV)-experienced CD4+ T cells on day 2 after Lpn challenge ( $n = 4-5$ ). G,  $5 \times 10^5$  CD4+ T cells isolated from the lung were transferred i.v. into congenic hosts one day before Lpn infection and the IFN- $\gamma$  response was measured 2 days post infection ( $n = 4-5$ ). H, Splenocytes from naive Smarta mice were isolated, CellTrace Violet (CTV) labelled and stimulated as indicated for 3d. I, mice received  $5 \times 10^4$  Smarta cells i.v. one day prior to LCMV infection (memory) or  $10^6$  naive Smarta cells one day before Lpn challenge (control). IFN- $\gamma$  response in SMARTA cells was determined on the indicated days ( $n = 5$ ). J-L, Mice received  $\alpha$ CD4 or  $\alpha$ CD8 depletion or IgG control antibody 5 and 3 days prior to Lpn infection ( $n = 9-12$ ). Number of IFN- $\gamma$ + CD4+ T cells (J, L) and IFN- $\gamma$ + CD8+ T cells (K, L) was determined on day 3. Mean  $\pm$  s.d., Brown-Forsythe and Welch ANOVA (J, K), two-way ANOVA (Šidák; C, D, E, G, I) and Mann-Whitney U test (F).

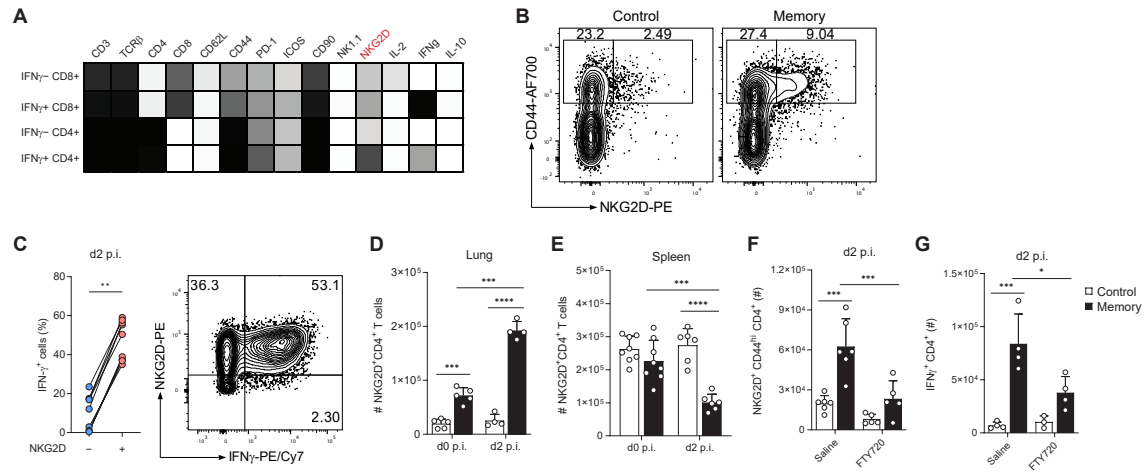

**Fig. S2. Increased numbers of NKG2D<sup>+</sup> CD44<sup>hi</sup> CD4<sup>+</sup> T cells in the lung are dependent on migration.** A, cells from the lung of LCMV memory or control mice challenged with Lpn were treated with Brefeldin A and acquired by CyTOF. T cell populations were annotated according to lineage marker expression and a heat map showing relative expression of the indicated markers within the respective T cell populations is shown. B, representative FACS plots of CD4<sup>+</sup> T cells from the lung of LCMV memory or control mice 2d post Lpn infection. C, IFN- $\gamma$  response in NKG2D<sup>-</sup> and NKG2D<sup>+</sup> CD44<sup>+</sup>CD8<sup>+</sup> T cells (left) and representative FACS plot gated on CD44<sup>+</sup>CD8<sup>+</sup> T cells (right) obtained from lungs of LCMV memory mice challenged with Lpn (2 dpi; n=9). D–E, NKG2D<sup>+</sup> CD44<sup>+</sup>CD4<sup>+</sup> T cells in LCMV memory or control mice were analyzed before (d0) and 2d after Lpn challenge (n = 4–8). F–G, total numbers of the indicated cell populations from lungs of mice treated with FTY720 (20 mg i.p.) or PBS (n = 3–6). Mean  $\pm$  s.d., statistical significance was tested by Wilcoxon matched-pairs signed rank (C), and two-way ANOVA (Šidák).

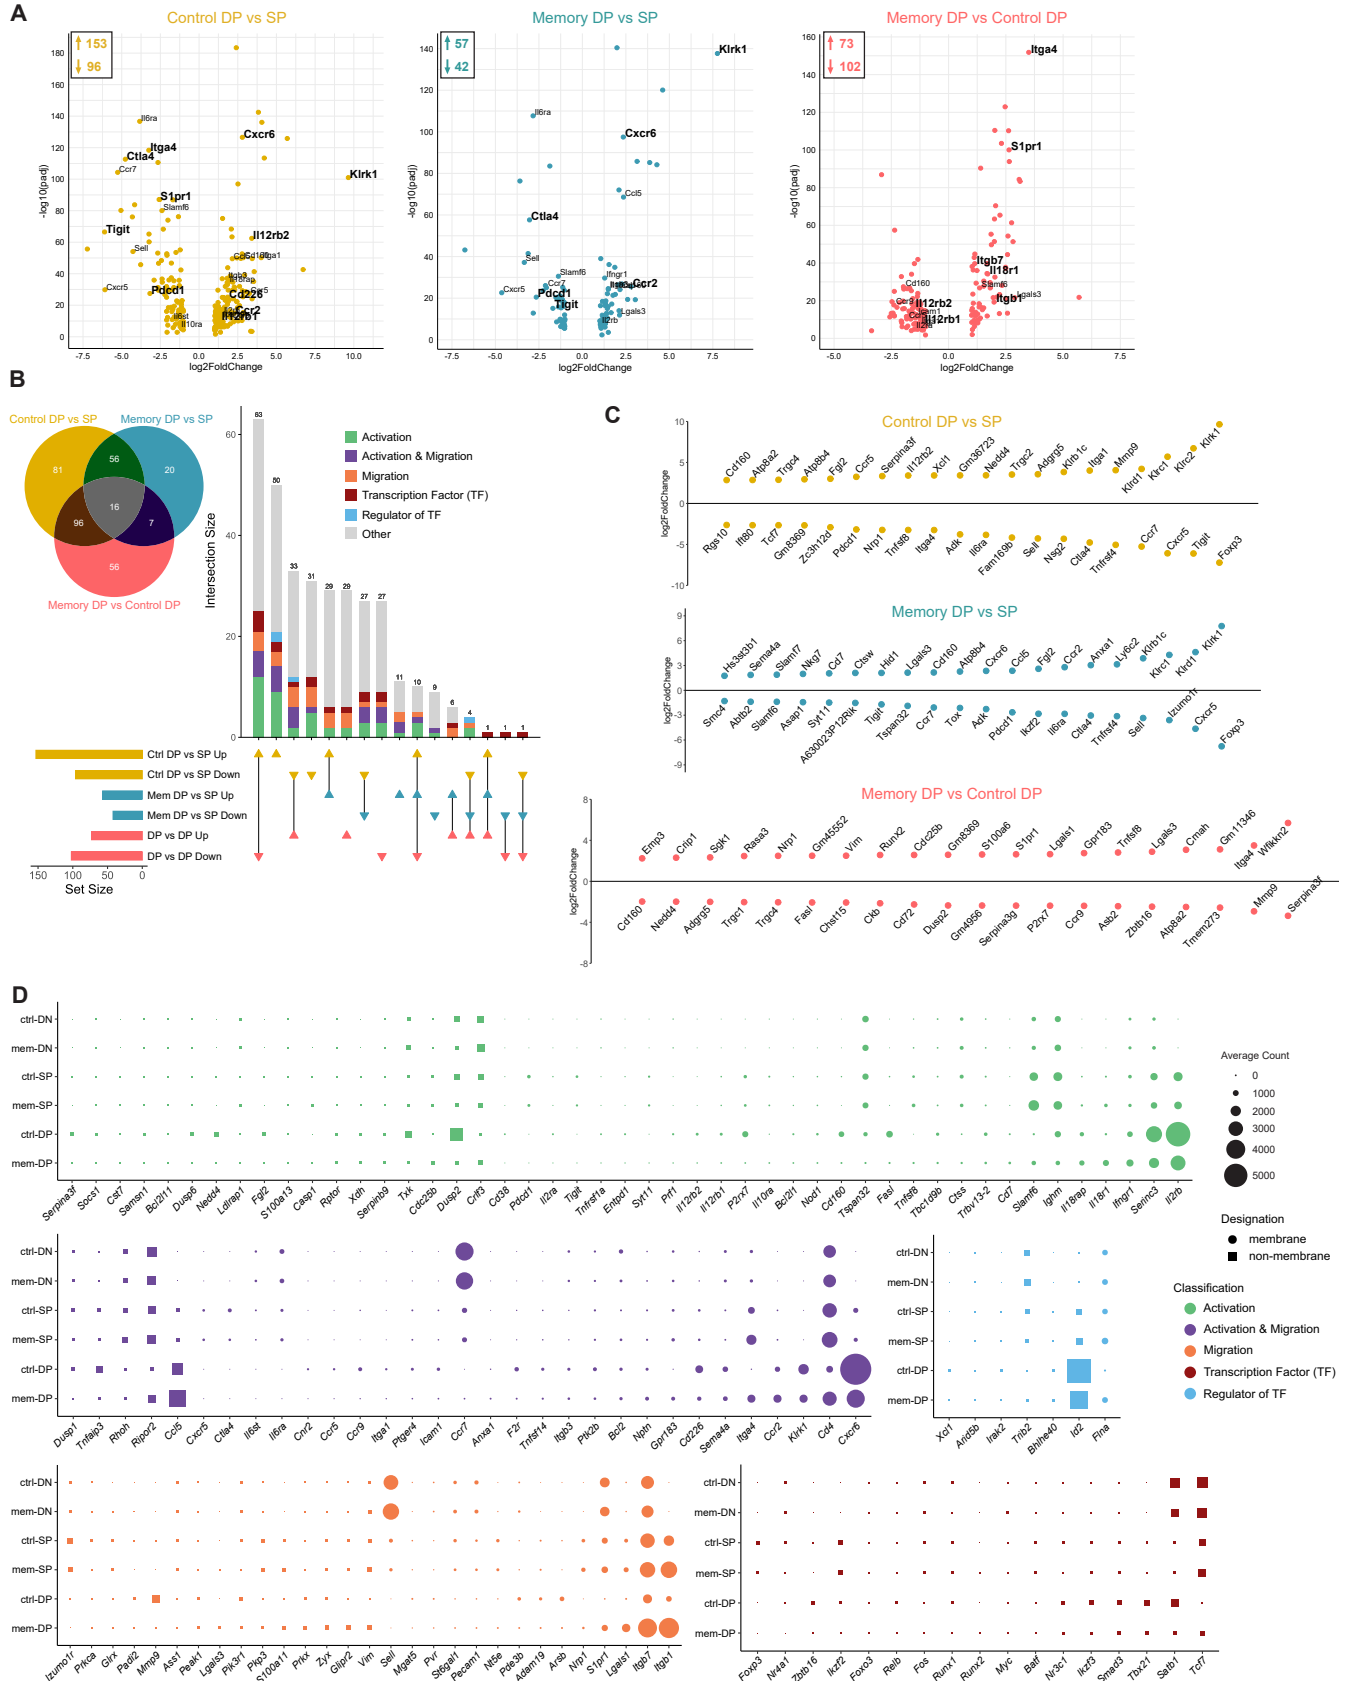

P value (volcano) plot of gene expression in the three indicated paired samples (DN: CD44<sup>hi</sup>NKG2D<sup>-</sup>, SP: CD44<sup>hi</sup>NKG2D<sup>-</sup>, DP: CD44<sup>hi</sup>NKG2D<sup>+</sup> CD4<sup>+</sup> T cells). B–D, differentially expressed genes (DEGs) from RNA-Seq data were obtained by combining 3 pairwise comparisons. Venn diagram shows the number and overlap of DEGs obtained from each comparison. B, UpSet plot depicts up- and down-regulated genes and the overlap among them. Color-coded vertical bars represent number of DEGs classified by their GO term. C, top 20 up- and down-regulated genes within each pairwise comparison. DEGs from each paired analysis was combined and subdivided according to their GO classification. D, balloon plot shows the average normalized counts of each cell population for the indicated genes.

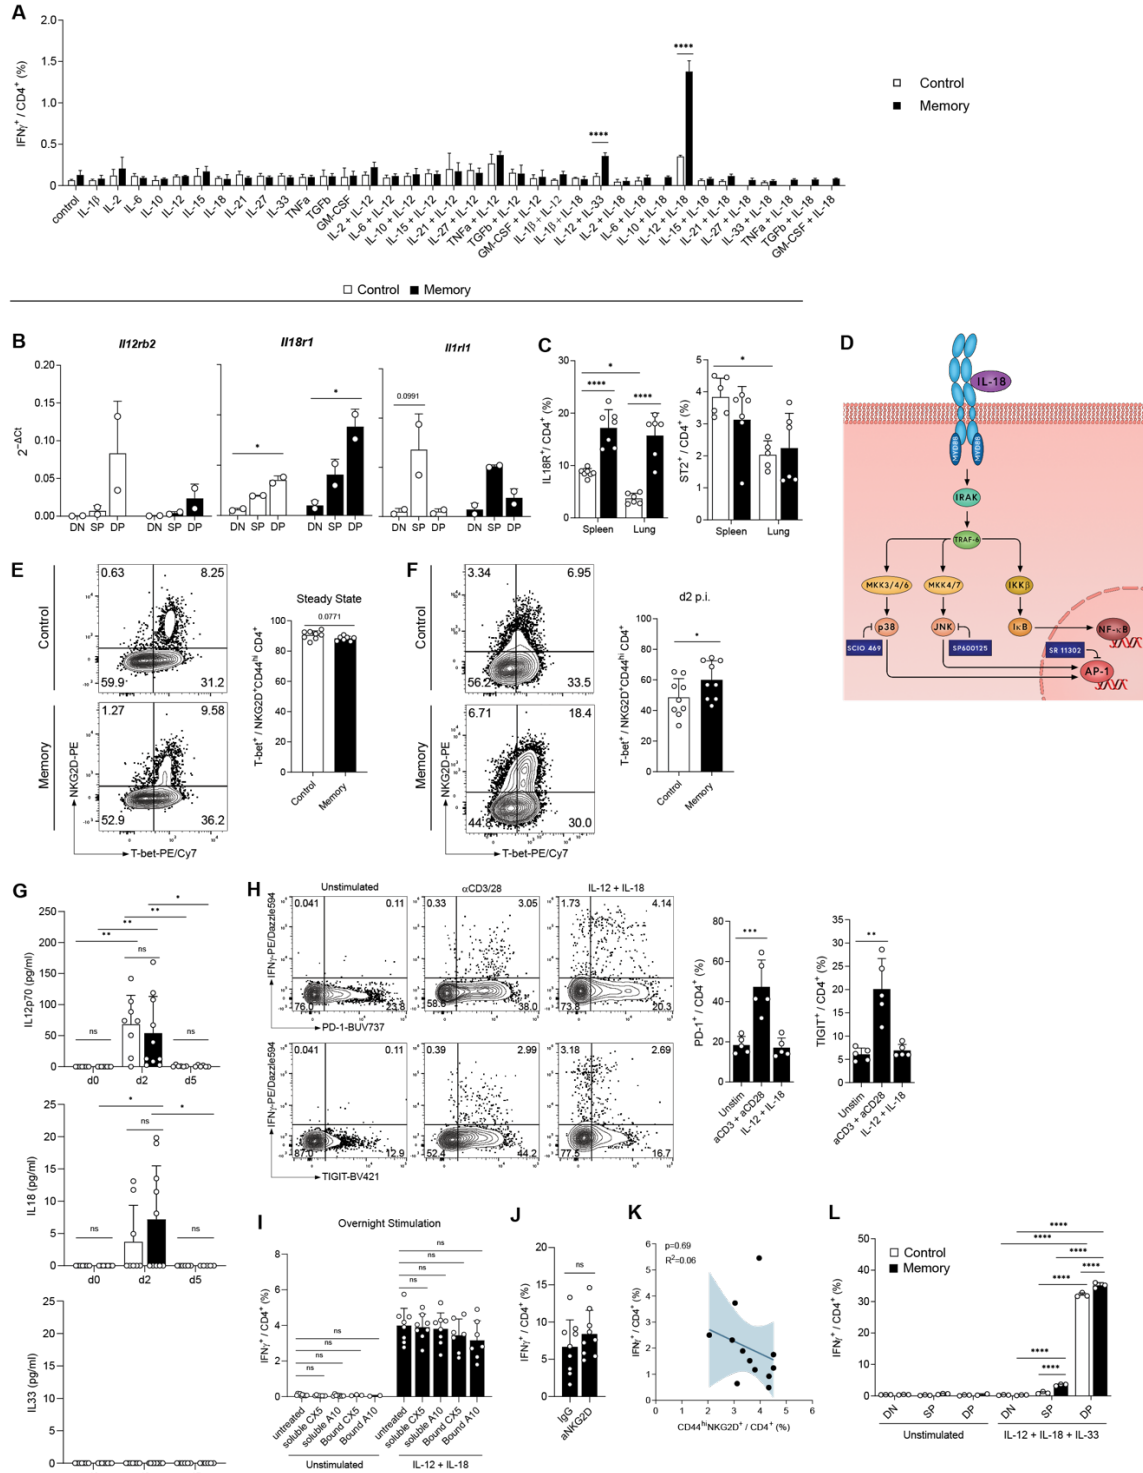

**Fig. S4. TCR-independent activation of CD4<sup>+</sup> T<sub>1A</sub> cells through cytokine stimulation.** A–B, CD4<sup>+</sup> T cells isolated from spleen of LCMV memory or control mice were incubated with the indicated cytokines for 16h and analyzed by flow cytometry (A, n = 3–4). Cells were sorted according to the gating shown in Figure 2B and relative gene expression was determined by qRT-PCR (B, n = 2). C, *ex vivo* expression of the indicated markers in CD4<sup>+</sup> cells from LCMV memory or control mice (n = 5–7). D, scheme depicting IL-18R signaling and intervention points of the

inhibitors used in Figure 3D. E–F, T-bet expression of T<sub>IA</sub> cells in the spleen at steady state (E, n = 8) and in the lung 2d post Lpn challenge (F, n = 9). Representative FACS plots were gated on CD4<sup>+</sup>CD44<sup>+</sup> cells. G, Bronchoalveolar Lavage (BAL) fluid was collected on the indicated days and IL-12, IL-18, and IL-33 concentrations were measured by CBA (n = 5–10). H–I, splenic CD4<sup>+</sup> T cells from LCMV memory mice were treated as indicated for 24h (H, n = 3) or overnight (I, n = 2–10; Clone CX5: antagonistic  $\alpha$ -NKG2D, Clone A10: agonistic  $\alpha$ -NKG2D; added in solution or plate bound as indicated) before IFN- $\gamma$  production was determined by flow cytometry. J, d2 response of CD4<sup>+</sup> T<sub>IA</sub> cells in the lung of LCMV memory mice treated with blocking  $\alpha$ -NKG2D (CX5) antibody or IgG control on d-1, d0, and d1 of Lpn infection (n=9). K, linear regression of splenic control and memory CD4<sup>+</sup> T cells stained *ex vivo* (x-axis) and IFN- $\gamma$  production upon overnight IL-12+IL-18 stimulation (y-axis). 95% confidence interval is indicated (n = 12). L, using the sorting strategy from Figure 2B, splenic CD4<sup>+</sup> T cells were treated overnight as indicated (n = 2–3). Mean  $\pm$  s.d., two-way ANOVA (*Šidák*; A–D, I, L), Mann-Whitney U test (F, G, J) and Kruskal-Wallis test (H).

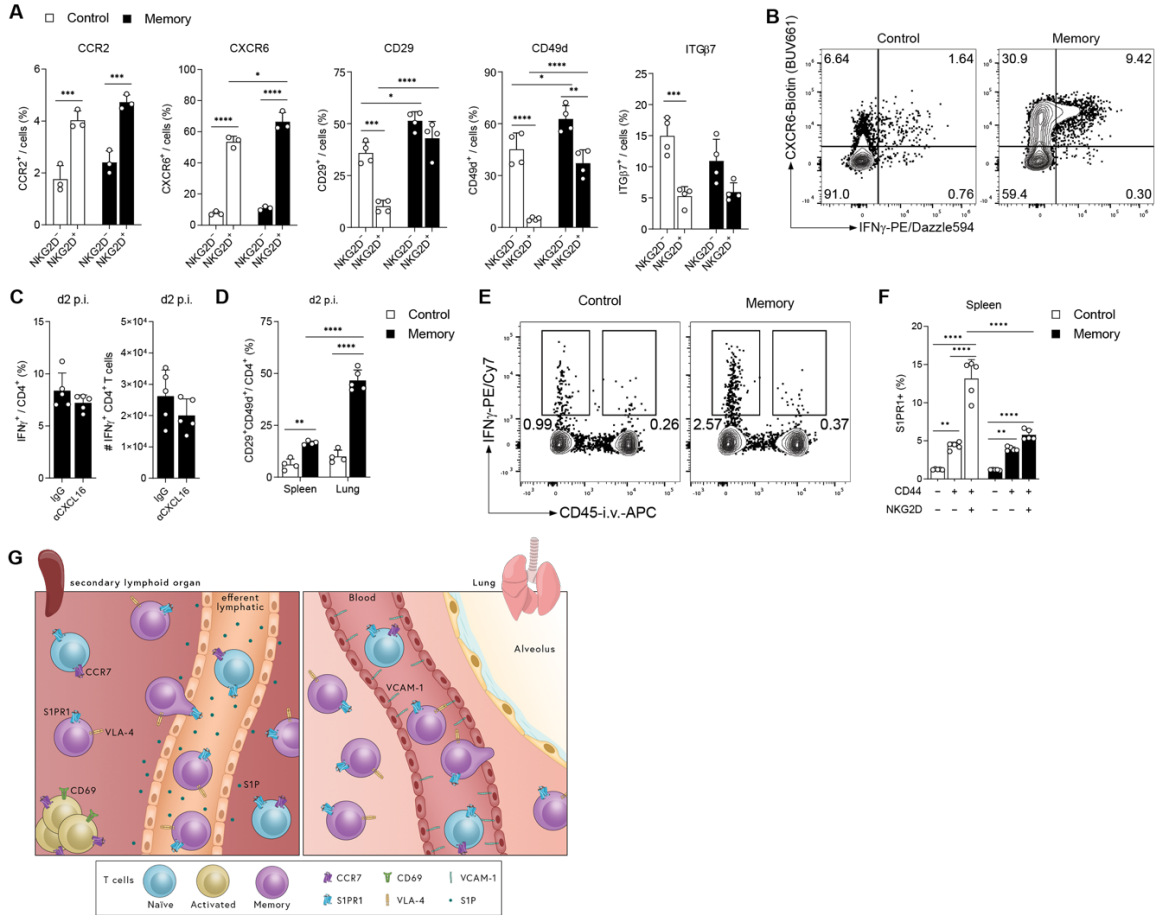

**Fig. S5. Migration-associated markers expressed in CD4 T<sub>1A</sub> cells.** A, frequencies of the indicated chemokine receptors and integrins among NKG2D<sup>+</sup> or NKG2D<sup>-</sup> CD44<sup>hi</sup>CD4<sup>+</sup> T cells from control or LCMV memory mice (n = 3–4). B, *ex vivo* FACS staining of CD4<sup>+</sup> T cells from the lung at d2 post Lpn infection. C, *ex vivo* analysis of lung CD4<sup>+</sup> T cells from LCMV memory mice d2 post Lpn infection after treatment with blocking αCXCL16 antibody or control IgG (n = 5). D, frequency of VLA-4<sup>+</sup> cells among CD4<sup>+</sup> T cells (n = 4–5). E, IFN-γ production in lung CD4<sup>+</sup> T cells was assessed 2d after Lpn challenge in mice injected with αCD45 Ab i.v. prior to sacrifice to stain leukocytes within the vasculature. F, S1PR1 frequency among indicated populations pre-Lpn challenge determined by flow cytometry (n=5). G, schematic representation of S1PR1-dependent lymphocyte egress and VLA-4 mediated extravasation. Mean ± s.d., two-way ANOVA (Šidák; A, E, G) and Mann-Whitney U test (C).



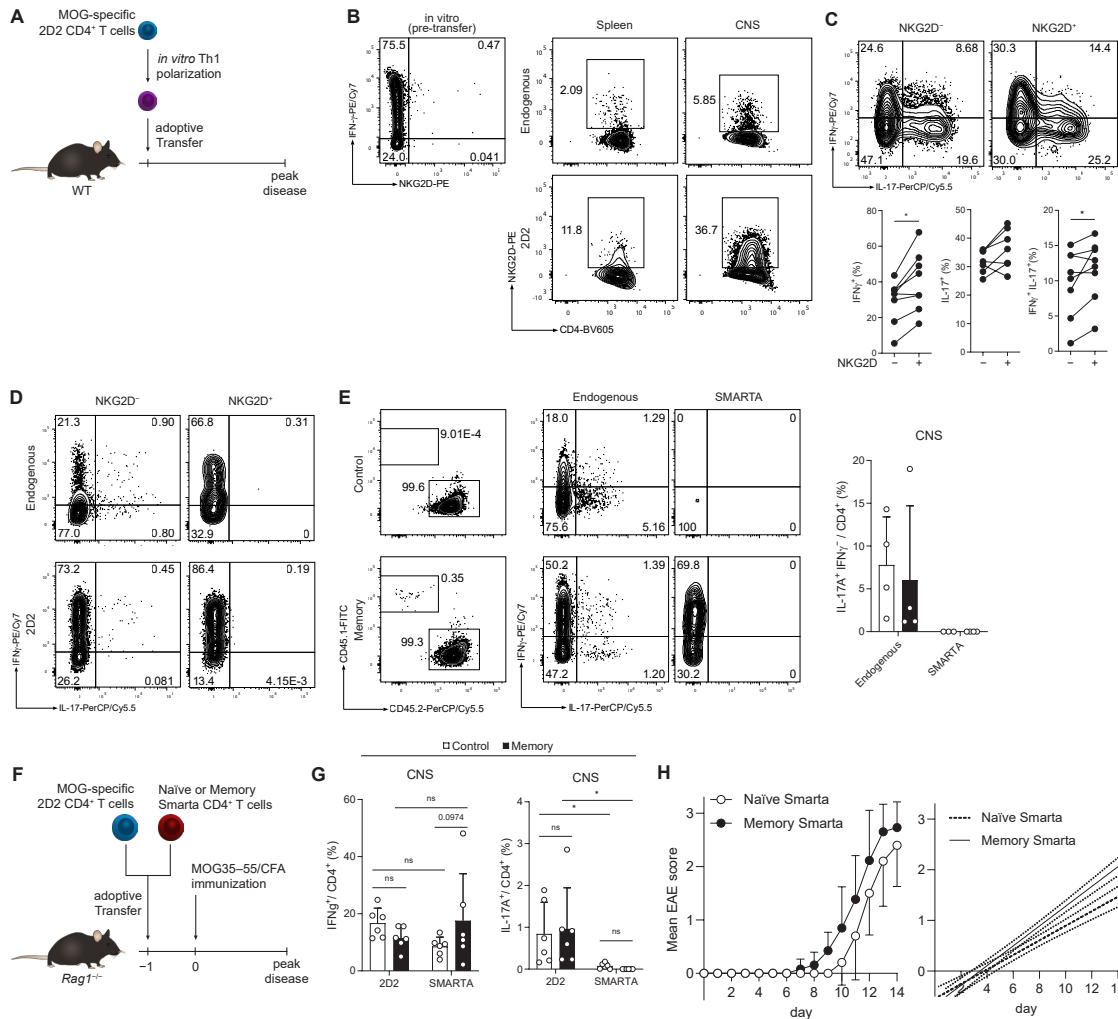

**Fig. S6. Bystander activation of memory CD4<sup>+</sup> T cells in the CNS in EAE.** A, experimental layout of the 2D2 cell-mediated EAE model. B, *in vitro* differentiated Th1 2D2 cells were analyzed for expression of NKG2D and IFN- $\gamma$  before transfer for EAE induction (left). At the peak of disease, CD4<sup>+</sup> T cells were analyzed for expression of NKG2D (right). C, NKG2D, IFN- $\gamma$  and IL-17 expression in CD4<sup>+</sup> T cells isolated from the CNS of MOG<sub>35-55</sub>/CFA-immunized B6 mice (n = 7–8). D, CD4<sup>+</sup> T cells isolated from the CNS of Th1 adoptive transfer EAE mice were analyzed for expression of IFN- $\gamma$  and IL-17. E, MOG<sub>35-55</sub>/CFA-immunized B6 mice were injected with either 2x10<sup>6</sup> naïve or memory SMARTA cells. SMARTA (CD45.1<sup>+</sup>CD45.2<sup>-</sup>) and endogenous (CD45.1<sup>-</sup>CD45.2<sup>+</sup>) CD4<sup>+</sup> T cells from the CNS were analyzed for expression of IFN- $\gamma$  and IL-17 (n = 4). Representative plots and summary graphs are shown. F–H, 5x10<sup>5</sup> Smarta + 5x10<sup>5</sup> 2D2 were transferred into Rag1<sup>-/-</sup> mice for EAE induction. Experimental layout (F), cytokine production (G) and clinical scores with linear regression (H, 95% confidence interval, n=10–13). Mean  $\pm$  s.d., Wilcoxon matched-pairs signed rank test (C) and two-way ANOVA (Šidák; E, G)

**Table S2.** Antibodies used for CyTOF analysis.

| <b>Target antigen</b> | <b>Antibody clone</b> | <b>Label</b> | <b>Catalog number</b> |
|-----------------------|-----------------------|--------------|-----------------------|
| CD45                  | HI30                  | 089Y         | Fuidigm 3089003B      |
| Ly6G/C (Gr1)          | RB6-8C5               | 141Pr        | Fuidigm 3141005B      |
| TIGIT                 | 1G9                   | 143Nd        | Biolegend 142102      |
| IL-2                  | JES6-5H4              | 144Nd        | Fuidigm 3144002B      |
| CD69                  | H1.2F3                | 145Nd        | Fuidigm 3145005B      |
| CD8a                  | 53-6.7                | 146Nd        | Fuidigm 3146003B      |
| NKG2D (CD314)         | CX5                   | 147Sm        | Biolegend 130204      |
| CD11b (MAC1)          | M1/70                 | 148Nd        | Fuidigm 3148003B      |
| CD19                  | 6D5                   | 149Sm        | Fuidigm 3149002B      |
| CD49d                 | R1-2                  | 151Eu        | Fuidigm 3151016B      |
| CD3e                  | 145-2C11              | 152Sm        | Fuidigm 3152004B      |
| CD226                 | 10E5                  | 153Eu        | Biolegend 128822      |
| CD155                 | TX56                  | 155Gd        | Biolegend 131502      |
| CD90                  | 30-H12                | 156Gd        | Fuidigm 3156006B      |
| FoxP3                 | FJK-16s               | 158Gd        | Fuidigm 3158003A      |
| CD279 (PD1)           | 29F.1A12              | 159Tb        | Fuidigm 3159024B      |
| CD62L                 | MEL-14                | 160Gd        | Fuidigm 3160008B      |
| CD96                  | 3.3                   | 161Dy        | Biolegend 131704      |
| CD366 (TIM3)          | RMT323                | 162Dy        | Fuidigm 3162029B      |
| IL-10                 | JES5-16E3             | 163Dy        | Biolegend 505012      |
| CD49b                 | HMa2                  | 164Dy        | Fuidigm 3164011B      |
| IFN- $\gamma$         | XMG1.2                | 165Ho        | Fuidigm 3165003B      |
| ICOS                  | C398.4A               | 168Er        | Fuidigm 3168024B      |
| TCR $\beta$           | H57-597               | 169Tm        | Fuidigm 3169002B      |
| NK1.1                 | PK136                 | 170Er        | Fuidigm 3170002B      |
| CD44                  | IM7                   | 171Yb        | Fuidigm 3171003B      |
| CD4                   | RM4-5                 | 172Yb        | Fuidigm 3172003B      |
| CD223 (LAG3)          | C9B7W                 | 174Yb        | Fuidigm 3174019B      |
| CD127                 | A7R34                 | 175Lu        | Fuidigm 3175006B      |
| B220                  | RA3-6B2               | 176Yb        | Fuidigm 3176002B      |
| CD11c                 | N418                  | 209Bi        | Fuidigm 3209005B      |

**Dataset S1 (separate file).** Sequencing data are deposited on the ArrayExpress database at EMBL-EBI is available via the accession number E-MTAB-11521.
